1 **An allometric scaling approach to estimate epiphytic bryophyte biomass in tropical**  
2 **montane cloud forests**

3 Guan-Yu Lai<sup>1</sup>, Hung-Chi Liu<sup>1</sup>, Ariel J. Kuo<sup>2</sup>, Cho-ying Huang<sup>1,3,\*</sup>

4 <sup>1</sup>Department of Geography, National Taiwan University, Taipei 10617, Taiwan

5 <sup>2</sup>Department of Civil and Environmental Engineering, University of California, Los Angeles,  
6 CA 90024, USA

7 <sup>3</sup>Research Center for Future Earth, National Taiwan University, Taipei 10617, Taiwan

8 \*Corresponding author

9 Tel: 886 2 33663733; E-mail: [choying@ntu.edu.tw](mailto:choying@ntu.edu.tw)

10 **Abstract**

11 Epiphytic bryophytes (EB) are some of the most commonly found plant species in tropical  
12 montane cloud forests, and they play a disproportionate role in influencing the terrestrial  
13 hydrological and nutrient cycles. However, it is difficult to estimate the abundance of EB due to  
14 the nature of their “epiphytic” habitat. This study proposes an allometric scaling approach to  
15 measure EB biomass, implemented in 16,773 ha tropical montane cloud forests of northeastern  
16 Taiwan. A general allometry was developed to estimate EB biomass of 100 cm<sup>2</sup> circular-shaped  
17 mats (n = 131) and their central depths. A point-intercept instrument was invented to measure  
18 the depths of EB along tree trunks (n = 210) below 3-m from the ground level (sampled stem  
19 surface area [SSA]) in twenty-one 30 × 30 m plots. Biomass of EB of each point measure was  
20 derived using the general allometry and was aggregated across each SSA, and its performance  
21 was evaluated. Total EB biomass of a tree was estimated by referring to an *in-situ* conversion  
22 model and was interpolated for all trees in the plots (n = 1451). Finally, we assessed EB  
23 biomass density at the plot scale and preliminarily estimated EB biomass of the study region.  
24 The general EB biomass-depth allometry showed that the depth of an EB mat was a salient  
25 variable for biomass estimation ( $R^2 = 0.72$ ,  $p < 0.001$ ). The performance of upscaling from mats  
26 to SSA was satisfactory, which allowed us to further estimate mean ( $\pm$  standard deviation) EB  
27 biomass of the 21 plots ( $272 \pm 104$  kg ha<sup>-1</sup>) and to provide preliminary estimation of the total  
28 EB biomass of 4562 Mg for the study region. Since a significant relationship between tree size  
29 and EB abundance is commonly found, regional EB biomass may be mapped by integrating our  
30 method and three-dimensional airborne data.

31 **Keywords:** conifer, diameter at breast height (DBH), lichen, liverwort, moss, scaling, Taiwan,  
32 tree size

## 33 1 INTRODUCTION

34 Bryophytes are rootless, non-vascular terrestrial plants such as mosses, liverworts and hornworts.  
35 Due to their primitive physiological characteristics, bryophytes are sensitive to the recent  
36 changes in climate such as increases in air temperatures (Aptroot & Van Herk 2007; Zotz &  
37 Bader 2009) and atmospheric carbon dioxide (Turetsky 2003), and decreases in precipitation  
38 (Gignac 2001). Epiphytic bryophytes (EB) are species that grow on the surface of a plant above  
39 the ground. They are some of the most representative lifeforms of tropical montane cloud forests  
40 (TMCF) (Barkman 1958; Smith 1982), which are ecosystems that experience frequent  
41 immersion of low altitude cloud (also known as “fog”, exchangeably used hereafter) with high  
42 humidity. Tropical montane cloud forests, as suggested by their name, are mostly distributed  
43 over mountainous regions. While covering only about 0.14% (~30M ha) of the Earth’s terrestrial  
44 surface (Bruijnzeel, Mulligan, & Scatena 2011) and 2.5% of tropical forests of the world (Bubb  
45 *et al.* 2004), they are the major water sources for lowland environments. As a result, TMCFs play  
46 a disproportionately-large role in the functioning of a global terrestrial ecosystem relative to their  
47 limited distribution.

48 Epiphytic bryophytes may obtain necessary water and nutrients for growth by intercepting  
49 parallel fog water (Stadtmüller 1987; Holwerda *et al.* 2010; Scholl, Eugster, & Burkard 2011). In  
50 some regions, EB are keystone species for providing water and essential nutrients to maintain the  
51 health of TMCFs (Gradstein 2008; Zotz & Bader 2009) and may affect carbon storage of an  
52 entire ecosystem. They may also influence the global hydrological cycle by modifying  
53 precipitation and evaporation levels (Rhoades 1995; Chang, Lai, & Wu 2002; Porada, Van Stan,  
54 & Kleidon 2018). In the recent decades, land use and land cover change (Ray *et al.* 2006), and  
55 the prevailing global trend of elevated temperatures (Still, Foster, & Schneider 1999; Foster

56 2001) may alter regional climate in tropics, resulting in substantial ramifications on EB (Benzing  
57 1998) and eventually TMCF. As “canaries in the coal mine” (Gignac 2001), spatiotemporal  
58 dynamics of EB may be effective indicators for monitoring the regional and global climate  
59 changes. One of the very first steps in this research field is to quantify the abundance of EB,  
60 which has been a very challenging task due to nature of their habitats and diverse morphologies  
61 (McCune & Lesica 1992).

62 Biomass is a major metric to assess the abundance of plants (Bonham 2013). For EB,  
63 biomass is also a key indirect parameter to assess the capacity of TMCFs to intercept fog (Zotz  
64 & Vollerath 2003). The abundance of EB in TMCFs may be affected by microclimatic (e.g.,  
65 humidity, temperature, luminosity) and host structural (such as tree size, height and density)  
66 attributes (Peck, Hong, & McCune 1995; Freiberg & Freiberg 2000; Nöske *et al.* 2008; Chen,  
67 Liu, & Wang 2010). Field survey approaches such as destructively sampling with interpolation  
68 on the ground for low stature (Ah-Peng *et al.* 2017) or fallen (Chen, Liu, & Wang 2010) trees,  
69 and using a ladder, rope (Hsu, Horng, & Kuo 2002; Nakanishi *et al.* 2016), high tower or crane  
70 (McCune *et al.* 1997; McCune *et al.* 2000) to reach tall trees have been commonly implemented  
71 to measure EB biomass (see Table 1 a comprehensive summary). However, field EB  
72 measurements have been known to be quite challenging to carry out, which made regional  
73 quantification impractical (Moffett & Lowman 1995; Barker & Pinard 2001). In this paper, we  
74 proposed a simple and effective field allometric scaling method to estimate EB biomass for  
75 TMCF, which combines small-scale destructive field biomass collection, vertical point intercept  
76 sampling conducted by a newly-invented instrument, and up-scaling the biomass estimation with  
77 a previously established *in-situ* equation and data interpolation.

## 78 2 MATERIALS AND METHODS

### 79 2.1 Study site

80 The study was focused on 16,773 ha TMCF of Chilan Mountain (24°98'N, 120°97'E) in  
81 northeastern Taiwan (the spatial boundary defined by referring to Schulz *et al.*, 2017). The  
82 precipitation in summer and winter consists of mostly orographic precipitation and tropical  
83 cyclones (regionally known as typhoons), and the northeastern monsoon, respectively. Annual  
84 precipitation and mean temperature of the site are 3,500 mm y<sup>-1</sup> and 12.7°C, respectively. The  
85 mean ( $\pm$  standard deviation [SD]) elevation of the site is 1680  $\pm$  343 m a.s.l., and mean slope ( $\pm$   
86 SD) is 38.2°  $\pm$  13.4° ranging from 0° to 88.7°. The rugged terrain faces regular moist wind from  
87 the Pacific Ocean resulting in frequent occurrences of upslope fog approximately 300+ days of a  
88 year and 38% of the time (Lai *et al.* 2006). This humid bioclimate harbors a substantial amount  
89 of EB. There were 49 and 24 species observed in mature old-growth and regenerated forests,  
90 respectively, by a preliminary local inventory (Chang, Lai, & Wu 2002). The primary vegetation  
91 type of the TMCF is conifer forest, dominated by hinoki cypress (*Chamaecyparis obtusa* var.  
92 *formosana*) and Japanese cedar (*Cryptomeria japonica*). Bryophytes are the dominant epiphytic  
93 species of the region, occupying 93.5% of the total biomass (Deng 2006).

### 94 2.2 The patch scale EB biomass sampling and model development

95 The first step was to derive a general allometry for EB biomass, and six sites along the elevation  
96 gradient of 1200–1950 m a.s.l. were selected for sample collection (Figure S1). In the summer  
97 (May-October) of 2017, the center depth (e.g., from rhizoids to the top of a plant) of each EB  
98 species (n = 131; 113 liverworts, 17 mosses and 1 lichen) (for details of the species see the  
99 spreadsheet in Supplementary Information) within a randomly-selected 100 cm<sup>2</sup> circular patch of

100 a tree stem below 3 m above the ground was measured using a stainless steel ruler, and the  
101 sample was removed using a gardening shovel. Only a single species in the patch with the  
102 homogeneous depth was confirmed before the sample removal. The method has been applied  
103 previously by Rodríguez-Quiel, Mendieta-Leiva and Bader (2019). We note that one lichen  
104 sample was included in the model development due to the presence of a small portion of lichen  
105 among EB. The samples were stored in sealed linear low-density polyethylene bags to maintain  
106 moisture, then placed in an ice box and transported to a laboratory within eight hours after their  
107 removal from host trees. The samples were cleaned of dead organic matter, suspended soil and  
108 tree bark with tap water, dried in a 70°C biomass oven for at least 72 hours, and weighed using a  
109 three decimal place electronic balance (LIBROR EB-430H, Shimadzu, Japan). In this study, EB  
110 biomass was defined as the total sampled dry weight divided by the projected surface area of the  
111 sample ( $\text{mg cm}^{-2}$ ). The depth of EB was used as a unique trait for each independent sample to  
112 develop EB biomass allometric equations:

$$113 \quad W = \alpha D^\beta \quad (1)$$

114 where  $W$  is the EB biomass ( $\text{mg cm}^{-2}$ ),  $D$  is the EB depth (cm), and  $\alpha$  and  $\beta$  are the exponent  
115 components for the model. A power model was selected to fit the data by referring to previous  
116 studies (Niklas 1993; Niklas 2006) using R v. 3.5.0. (Stanford University; [http://www.r-](http://www.r-project.org/)  
117 [project.org/](http://www.r-project.org/)). Consecutive values ranging from 0.01 to 2.0 with an interval of 0.01 were selected  
118 for  $\beta$  with and without a fixed  $\alpha$  value of 10 to derive an optimized model to fit the empirical  
119 data using generalized least squares. The method (generalized least squares) was specifically  
120 designed to minimize the effect of unequal variances, which were commonly observed in  
121 ecological data (Pinheiro & Bates 2006). Three variance covariate functions, the exponential of a

122 variance covariate (varExp in R), power of a variance covariate (varPower) and constant plus  
123 power of a variance covariate (varConsPower), were used to modify regression of the fitted  
124 values and the residuals within the fitted model. The Akaike information criterion (AIC), the  
125 Bayesian information criterion (BIC) and log-likelihood were considered when facilitating model  
126 selection (Burnham & Anderson 2004). All statistical analyses were conducted using the “nlme”  
127 package in R (Pinheiro *et al.* 2019).

### 128 **2.3 The tree scale EB biomass estimation**

129 The main goal of this study was to implement a new field method for estimating EB biomass of  
130 TMCF at the regional scale. Once the allometric model (equation (1)) has been established, the  
131 next step was to estimate EB biomass of a tree, and we could then interpolate the estimate in the  
132 plot and regional scales. Twenty-one 30 × 30 m plots along the elevation gradient of 1260–1990  
133 m a.s.l in Chilan Mountain of northeastern Taiwan were surveyed (Figure S1). Diameter at breast  
134 height (DBH) measured at 130 cm above the ground for each living tree with  $DBH \geq 5$  cm  
135 within 16 plots was recorded in July of 2016. The same approach was applied again to five more  
136 plots in January of 2019. During May-August of 2018 and January-February of 2019, we  
137 selected 10 trees (210 trees total) within each plot evenly distributed along the DBH gradient to  
138 interpolate EB biomass. Basal diameter (BD) of each sampled tree was also measured, and the  
139 relationship between basal area and DBH was investigated.

140 According to Johansson (1974) and Köhler *et al.* (2007), the majority of EB (in their case,  
141 71–91%) were present at the lower part of a tree in TMCF, which may be utilized as a salient  
142 variable in estimating EB biomass of a tree. Therefore, a new field instrument was designed  
143 specifically for the estimation of EB biomass at the tree scale (Figure 1). From the ground to 300

144 cm of each sampled tree stem height, the EB depths (including the absence of EB with the depth  
145 of 0 cm) were recorded for every 30 cm vertical interval in several directions and were converted  
146 to biomass by referring to the allometry (equation (1)) and then averaged. The procedure was not  
147 vice versa due to the non-linearity of the allometry (a power model). We note that all trees in the  
148 plots were taller than 300 cm. The biomass of EB below 300 cm of a host tree was derived by  
149 taking the sampled stem surface area (SSA) into account. According to the visual inspection, the  
150 shape of the trunk from the ground to 130 cm was defined as a truncated cone and from 130 cm  
151 to 300 cm from the ground as a cylinder. Accordingly, the surface area (cm<sup>2</sup>) of the trunk below  
152 3 m (SSA) was calculated by referring to equations (2) and (3):

$$153 \quad SSA = 170 \times \pi \times DBH + \pi \times l \times \left( \frac{BD}{2} + \frac{DBH}{2} \right) \quad (2)$$

$$154 \quad l = \sqrt{130^2 + \left( \frac{BD}{2} - \frac{DBH}{2} \right)^2} \quad (3)$$

155 where SSA (cm<sup>2</sup>),  $l$  (cm), DBH (cm) and BD (cm) are sampled stem area, slant length of the  
156 cone, diameter at breast height and basal diameter, respectively. The sampled trees with DBH  
157 larger than 20 cm were recorded in eight directions (north, northeast, east, southeast, south,  
158 southwest, west and northwest) otherwise in just four major cardinal directions by referring to a  
159 compass. In August 2019, we stripped EB mats of SSA from 30 randomly selected and widely-  
160 distributed trees of different sizes to verify the estimation.

## 161 **2.4 EB biomass up-scaling**

162 The biomass of EB of 10 sampled tree was estimated by referring to equation (4):

$$163 \quad \ln(M_{Total}) = 0.99\ln(DBH) + 0.68\ln(M_{SSA}) - 1.195 \quad (4)$$



164 where  $M_{total}$  and  $M_{SSA}$  are EB biomass (kg) of total surface area and SSA of a tree, respectively,  
165 according to the *in-situ* destructive measurement by stripping EB from 10 harvested hinoki trees  
166 ( $R^2 = 0.99$ ,  $p < 0.001$ ) (Deng 2006). Since the intercept of equation (4) is negative, resulting in  
167 negative values for small trees, a fixed ratio of 1.3 was then applied according to Deng (2006)  
168 for those trees. Sampled stem area of all trees ( $SSA_{total}$ ) in a plot was then estimated with the  
169 knowledge of DBH and DBH-BD of each tree (equations (2) and (3)), and EB biomass ( $M_{total}$ ,  
170 kg) (equation 5) and its density ( $\text{kg ha}^{-1}$ ) of a plot may be estimated by referring to equation (5)  
171 with the knowledge of EB biomass ( $M_{sampled}$ ) on SSA ( $SSA_{sampled}$ ) of 10 sampled trees.

$$172 \quad \frac{SSA_{total}}{SSA_{sa}} = \frac{M_{total}}{M_{sampled}} \quad (5)$$

173 Literature search was conducted in Google Scholar (<https://scholar.google.com/>) with the  
174 keywords “epiphytic bryophyte” and “biomass” for a general comparison of EB biomass density  
175 (with basic bioclimatic information). We note that for the sake of quality control, non-refereed  
176 articles such as graduate theses and conference proceedings were excluded. Finally, since the  
177 stand characteristics of selected plots were quite representative of the region by referring to  
178 Wang and Huang (2012), Hu and Huang (2019) and several local inventory data, EB biomass of  
179 TMCF in Chilan Mountain may be estimated after taking the areal size of the region (16,773 ha)  
180 into account.

## 181 **3 RESULTS**

### 182 **3.1 Epiphytic bryophytes biomass allometry**

183 In this study, we collected 100 cm<sup>2</sup> circular-shaped EB samples (n = 131) from six forest stands  
184 in Chilan Mountain along an elevation gradient. The mean ( $\pm$  SD [minimum–maximum])

185 sampled EB depth and biomass were  $4.5 \pm 2.9$  cm (0.3–13.7 cm) and  $36.0 \pm 20.3$  (6.2–99.3) mg  
186  $\text{cm}^{-2}$ , respectively. Significant positive correlations ( $p < 0.005$ ) were found among EB depth and  
187 biomass with different regression models (Table 2). Performance of the allometric equation of  
188 the power of variance covariate function ( $R^2 = 0.72$ ,  $p < 0.0001$ ) with smaller AIC and BIC and  
189 greater log likelihood was superior to other models, and the model was selected for further  
190 analyses (Figure 2).

### 191 **3.2 The tree-scale EB biomass estimation**

192 Ten trees evenly distributed along the DBH gradient of each plot (total 210 trees) were selected  
193 to investigate the relationship between DBH and BD of EB-hosted trees. The mean ( $\pm$  SD  
194 [minimum–maximum]) DBH and BD of sampled trees were  $33.5 \pm 27.8$  (7.6–128.7) cm and  
195  $49.5 \pm 34.5$  (9.9–186.2) cm, respectively. High correlation ( $R^2 = 0.94$ ,  $p < 0.0001$ ) was found  
196 between DBH and BD (Figure S2). With this information, we computed SSA in the plots by  
197 referring to equations (2) and (3). The statistics (mean  $\pm$  SD [minimum–maximum]) of SSA was  
198  $3.5 \pm 2.8$  (0.81–13.5)  $\text{m}^2$ . Mean ( $\pm$  SD [minimum–maximum]) EB depth of the 210 sampled trees  
199 was  $1.1 \pm 0.6$  (0.1–3.1) cm, and the data was injected into the allometry (Figure 2) to yield EB  
200 biomass (mean  $\pm$  SD [minimum–maximum]) of  $10.2 \pm 5.2$  (0.7–26.1)  $\text{mg cm}^{-2}$  (or  $402.2 \pm 478.9$   
201 [8.3–2856.6] g) on SSA. We note that there was a significant positive curvilinear relationship ( $p$   
202  $< 0.001$ ) between DBH of the sampled tree and EB biomass on SSA (Figure 3).

203 Biomass of epiphytic bryophytes on 30 randomly selected trees with mean ( $\pm$  SD,  
204 minimum–maximum) DBH of  $26.2 \pm 21.5$  (5.7–93.0) cm was destructively collected to verify  
205 the proposed approach of upscaling the patch scale estimation (Figure 2) to SSA. Overall, the  
206 performance was satisfactory (Figure 4) and all samples but one outlier ( $R^2 = 0.82$  and  $0.95$

207 without the outlier,  $p < 0.0001$  for both model) were close to the 1:1 line (slope = 0.93 and 0.95  
208 without the outlier,  $p > 0.8$  for the intercepts of both models) with the mean absolute difference  
209 of 77.3 g (35.2% of the mean estimate) or 56.3 g (25.2% of the mean estimate) without the  
210 outlier. The outlier may be possibly due to rotten and soften tree barks underneath the EB mats  
211 (observed during the sample cleaning), and the depth of tree bark may have been included in the  
212 EB depth measurement, resulting in pronounced over-estimation. By applying the *in-situ*  
213 conversion function (equation (4)), the EB biomass (mean  $\pm$  SD [minimum–maximum]) for each  
214 sampled tree within the plots was estimated ( $818.3 \pm 1335.1$  [12.9–7279.1]) g ( $n = 210$ ).

### 215 **3.3 The plot and regional scales EB biomass estimation**

216 Mean ( $\pm$  SD [minimum–maximum]) DBH of the trees ( $n = 1451$ ) within twenty-one plots was  
217  $20.3 \pm 17.5$  cm (5.0–176.0 cm) (detailed plot-scale statistics of forest stands see Table S1). The  
218 EB biomass (and biomass density) for each plot can be interpolated by referring to the EB  
219 biomass of 10 sampled trees within each plot with the mean  $\pm$  SD (minimum–maximum) of  $24.5$   
220  $\pm 9.4$  (8.8–39.0) kg (or  $272.0 \pm 104.0$  [97.9–433.3] kg ha<sup>-1</sup>). Twenty-one refereed papers were  
221 found, and 86% (18/21) of the studies reported higher EB biomass density values than our mean  
222 plot/stand scale estimation (Table 1). Finally, with the knowledge of the plot-scale mean EB  
223 biomass density, we provided the preliminary estimation of the total EB biomass of 4562 Mg for  
224 the 16,773 ha TMCF of Chilan Mountain.

## 225 **4 DISCUSSION**

226 Epiphytic bryophytes are some of the most quintessential species characterizing mid-altitude  
227 tropical montane cloud forests (Bruijnzeel, Scatena, & Hamilton 2011) and play a pivotal role in  
228 influencing the global hydrological cycle (Porada, Van Stan, & Kleidon 2018). Due to the

229 diverse morphology of the species and their “epiphytic” habitat, it is difficult to quantify the  
230 abundance of EB. In this study, we propose a novel field protocol for regional EB biomass  
231 estimation. Our discussion will mainly focus on (1) EB depth-biomass allometry, (2) scaling of  
232 EB biomass from the patch to the regional scale, and (3) limitation and future directions.

#### 233 **4.1 The patch scale EB depth-biomass allometry**

234 In this study, *in-situ* general allometric equations were developed to estimate the biomass of a  
235 100 cm<sup>2</sup> circular patch of EB using the central depth of the sample (Figure 2). The performance  
236 was satisfactory, even though the morphology of EB is much more diverse than most vascular  
237 plants. Plant allometry focuses on relationships between plant body size and biomass,  
238 production, population density or other abundance related dependent variables (Enquist, Brown,  
239 & West 1998; Enquist *et al.* 1999). Stanton and Reeb (2016) suggested that some characteristics  
240 of bryophytes may be allometrically scaled like vascular plants, which was verified in this study.  
241 The mean exponent of the five selected power models was 0.75 (3/4) (Table 2), which agrees  
242 with the 3/4 power law (Kleiber 1947) and is similar to the constant scaling exponents over a  
243 wide range of vascular plant size, often with quarter-powers in metabolic scaling theory using  
244 biomass as an independent variable (West, Brown, & Enquist 1997; West, Brown, & Enquist  
245 1999). However, epiphytic bryophytes are non-vascular plants composed of a simple stem,  
246 which has a limited role in transporting moisture and nutrients through conducting tissues and  
247 does not follow the vascular transport system as a self-similar, fractal-like branching network  
248 (Ligrone, Duckett, & Renzaglia 2000). Two major branching forms of bryophytes are sympodial  
249 with connected modules of equal level and monopodial (Stanton & Reeb 2016). For most  
250 vascular plants, the branching bifurcation is two (Enquist *et al.* 2007), and the height is 1/4  
251 exponent of mass (West, Brown, & Enquist 1999). It was different to our empirical observation,

252 although the sampling unit was a mat but not an individual. This could verify that the basic  
253 assumption of an organism's self-similar branching network plays a major role in governing the  
254 allometric relationship.

#### 255 **4.2 Up-scaling of EB biomass**

256 A point-intercept field instrument was invented in this study to facilitate sampling EB height data  
257 along a tree stem, which were then used as an independent variable to estimate EB biomass  
258 (Figure 2) and EB biomass of SSA, and later extrapolate to the tree scale using an *in-situ*  
259 conversion equation (Equation (4)). The distribution of EB biomass on a tree could be very  
260 sensitive to the ambient environment (McCune 1993; Sillett & Antoine 2004). Therefore, we  
261 measured the depth of EB in four and eight directions for small ( $DBH \leq 20$  cm) and large ( $DBH$   
262  $> 20$  cm) trees, respectively, which may reduce microclimate-induced biases. The method was  
263 efficient, taking about 15 minutes for the four-direction measurement and double that amount of  
264 time for the eight-direction measurement. This may permit rapid sampling to obtain a large  
265 sample size (Table 1). With proper sampling design and data inter/extrapolation, we may be able  
266 to estimate EB biomass in a large region. Mean biomass density of EB estimated in this study  
267 was similar to the one conducted in the same region ( $230 \text{ kg ha}^{-1}$ ) but within a much smaller  
268 spatial extent using a destructive tree harvesting approach (Deng 2006). Our mean plot (forest  
269 stand) scale estimation of EB biomass density falls within the lower half of the EB biomass  
270 density global synthesis data (Table 1). It is challenging to make a fair comparison since those  
271 previous studies were conducted using different data collection methods over a wide range of  
272 spatial extents. However, in terms of efficiency, the proposed new approach is indeed superior to  
273 other sampling methods implementing for the sampling of 210 EB host trees in this study.

274           This point-intercept approach should also be applicable for the estimation of ground  
275 bryophyte biomass, and facilitates the estimation of overall abundance of bryophytes in an  
276 ecosystem. This is a pivotal but rarely available parameter, and has a major impact on regulating  
277 the terrestrial hydrological cycles (Porada, Van Stan, & Kleidon 2018). This study focused on  
278 the height of a tree below 3 m from the ground, where the majority of EB are present (Trynoski  
279 & Glime 1982) (Figure 1B). The sampled stem area may be further extended with aids of a  
280 foldable ladder.

### 281 **4.3 Limitation and future directions**

282 One potential research limit is that the tree scale EB biomass estimation, which was extrapolated  
283 from the estimation on SSA (equation 4), could not be validated with empirical data. The task is  
284 rather difficult and may be impractical for the study region. It requires tree climbing or  
285 destructive tree harvesting to strip EB of an entire tree. However, the support of tree climbing  
286 was not available during the time of conducting this study, and it could be risky to climb a small-  
287 size tree without reliable support for a climber's body weight. Logging for both natural and  
288 plantation forests has been completely forbidden in Taiwan since 1991. Therefore, the latter  
289 option may not be possible due to the local regulation. In the future, we might be able to take the  
290 advantage of tropical cyclone-induced fallen logs and harvest EB biomass at the ground level,  
291 since the island is located in a typhoon-prone region (Chi *et al.* 2015). However, this sampling  
292 approach could be biased since the probability of the strong wind induced tree falling may be  
293 associated with topography (Mitchell 2013), which also plays a pivotal role in governing the  
294 abundance of EB (Werner *et al.* 2012).

295           It is extremely challenging to non-destructively measure EB biomass, and a new field

296 approach was developed in this study to tackle this task. This is crucial because the age of EB on  
297 a tree could be almost as old as the age of the host tree (Kimmerer 2003), and it may require  
298 many years of recovery after the removal of samples (Fenton, Frego, & Sims 2003). It may be  
299 useful to further generalize the EB allometry (see the supplementary spreadsheet data) to make it  
300 applicable for other settings. According to this study (Figure 3) and some previous literature  
301 (Hsu, Horng, & Kuo 2002; Köhler *et al.* 2007; Chen, Liu, & Wang 2010), we found that there  
302 may be a significant relationship between the tree size and the abundance of EB. With the  
303 availability of a three-dimensional tree size spatial layer at the regional scale derived from high  
304 spatial resolution airborne lidar (light detection and ranging) or aerial photographic point cloud  
305 data (Chung *et al.* 2019; Kellner *et al.* 2019), we may be able to map EB biomass over a vast  
306 region.

### 307 **ACKNOWLEDGEMENTS**

308 We appreciate Jun Zhang and Hong-You Lin for providing field assistance. This study was  
309 sponsored by the Ministry of Science and Technology of Taiwan (MOST 106-2633-M-002-  
310 002-), National Taiwan University EcoNTU project (106R104516), and the NTU Research  
311 Center for Future Earth from the Featured Areas Research Center Program within the  
312 framework of the Higher Education Sprout Project by the Ministry of Education in Taiwan.

### 313 **AUTHORS' CONTRIBUTIONS**

314 GYL and CyH conceived the idea and developed the method for this research and led the  
315 writing of the manuscript; GYL, AJK and HCL analyzed the data. All authors collected field  
316 data and contributed critically to the drafts and gave final approval for publication.

### 317 **DATA AVAILABILITY**

318 Data used to derive epiphytic bryophyte allometry can be found in Supplementary Information.



319 **REFERENCES**

- 320 Ah-Peng, C., Cardoso, A. W., Flores, O., West, A., Wilding, N., Strasberg, D., & Hedderson, T.  
321 A. (2017). The role of epiphytic bryophytes in interception, storage, and the regulated  
322 release of atmospheric moisture in a tropical montane cloud forest. *Journal of Hydrology*,  
323 548, 665–673. <https://doi.org/10.1016/j.jhydrol.2017.03.043>
- 324 Aptroot, A., & Van Herk, C. (2007). Further evidence of the effects of global warming on  
325 lichens, particularly those with Trentepohlia phycobionts. *Environmental Pollution*, 146,  
326 293–298. <https://doi.org/10.1016/j.envpol.2006.03.018>
- 327 Barker, M. G., & Pinard, M. A. (2001). Forest canopy research: sampling problems, and some  
328 solutions. In K. E. Linsenmair, A. J. Davis, B. Fiala, & M. R. Speight (Eds), *Tropical*  
329 *forest canopies: ecology and management*, Forestry Sciences, vol 69 (pp. 23–38).  
330 Dordrecht, Netherlands: Springer. <https://doi.org/10.1023/A:1017584130692>
- 331 Barkman, J. J. (1958). *Phytosociology and ecology of cryptogamic epiphytes: including a*  
332 *taxonomic survey and description of their vegetation units in Europe*. Assen, Netherlands:  
333 Van Gorcum.
- 334 Benzing, D. H. (1998). Vulnerabilities of tropical forests to climate change: the significance of  
335 resident epiphytes. *Climatic Change*, 39, 519–540.  
336 <https://doi.org/10.1023/a:1005312307709>
- 337 Bonham, C. D. (2013). *Measurements for Terrestrial Vegetation*. West Sussex, UK: John Wiley  
338 & Sons. <https://doi.org/10.1002/9781118534540>
- 339 Bruijnzeel, L., Mulligan, M., & Scatena, F. N. (2011). Hydrometeorology of tropical montane  
340 cloud forests: emerging patterns. *Hydrological Processes*, 25, 465–498.  
341 <https://doi.org/10.1002/hyp.7974>
- 342 Bruijnzeel, L. A., Scatena, F. N., & Hamilton, L. S. (2011). *Tropical Montane Cloud Forests:*  
343 *Science for Conservation and Management (International Hydrology Series)*. Cambridge,  
344 UK: Cambridge University Press. <https://doi.org/10.1017/CBO9780511778384>
- 345 Bubb, P., May, I. A., Miles, L., & Sayer, J. (2004). *Cloud Forest Agenda*. Cambridge, UK:  
346 UNEP-World Conservation Monitoring Centre.
- 347 Burnham, K. P., & Anderson, D. R. (2004). Multimodel inference: understanding AIC and BIC in  
348 model selection. *Sociological Methods & Research*, 33, 261–304.  
349 <https://doi.org/10.1177/0049124104268644>
- 350 Chang, S.-C., Lai, I.-L., & Wu, J.-T. (2002). Estimation of fog deposition on epiphytic  
351 bryophytes in a subtropical montane forest ecosystem in northeastern Taiwan.  
352 *Atmospheric Research*, 64, 159–167. [https://doi.org/10.1016/S0169-8095\(02\)00088-1](https://doi.org/10.1016/S0169-8095(02)00088-1)
- 353 Chantanaorrapint, S., & Frahm, J.-P. (2011). Biomass and selected ecological factors of epiphytic  
354 bryophyte along altitudinal gradients in Southern Thailand. *Songklanakarin Journal of*  
355 *Science & Technology*, 33, 625–632.
- 356 Chen, L., Liu, W. y., & Wang, G. s. (2010). Estimation of epiphytic biomass and nutrient pools in  
357 the subtropical montane cloud forest in the Ailao Mountains, south-western China.  
358 *Ecological Research*, 25, 315–325. <https://doi.org/10.1007/s11284-009-0659-5>
- 359 Chi, C.-H., McEwan, R. W., Chang, C.-T., Zheng, C., Yang, Z., Chiang, J.-M., & Lin, T.-C.  
360 (2015). Typhoon disturbance mediates elevational patterns of forest structure, but not  
361 species diversity, in humid monsoon Asia. *Ecosystems*, 18, 1410–1423.
- 362 Chung, C.-H., Wang, C.-H., Hsieh, H.-C., & Huang, C.-Y. (2019). Comparison of forest canopy  
363 height profiles in a mountainous region of Taiwan derived from airborne lidar and

- 364 unmanned aerial vehicle imagery. *GIScience & Remote Sensing*, 56, 1289–1304.  
365 <https://doi.org/10.1080/15481603.2019.1627044>
- 366 Coxson, D. S. (1991). Nutrient release from epiphytic bryophytes in tropical montane rain forest  
367 (Guadeloupe). *Canadian Journal of Botany*, 69, 2122–2129. [https://doi.org/10.1139/b91-](https://doi.org/10.1139/b91-266)  
368 [266](https://doi.org/10.1139/b91-266)
- 369 Deng, Z.-H. (2006). The composition, distribution, and biomass of epiphytic bryophytes of a  
370 naturally regenerated *Chamaecyparis obtusa* var. *formosana* forest. *Master Thesis*,  
371 Department of Natural Resources and Environment Studies, College of Environment  
372 Studies, National Donghua University, Hualien, Taiwan.
- 373 Edwards, P., & Grubb, P. (1977). Studies of mineral cycling in a montane rain forest in New  
374 Guinea: I. The distribution of organic matter in the vegetation and soil. *Journal of*  
375 *Ecology*, 65, 943–969. <https://doi.org/10.2307/2259387>
- 376 Enquist, B. J., Brown, J. H., & West, G. B. (1998). Allometric scaling of plant energetics and  
377 population density. *Nature*, 395, 163–165. <https://doi.org/10.1038/25977>
- 378 Enquist, B. J., Kerkhoff, A. J., Huxman, T. E., & Economo, E. P. (2007). Adaptive differences in  
379 plant physiology and ecosystem paradoxes: insights from metabolic scaling theory.  
380 *Global Change Biology*, 13, 591–609. <https://doi.org/10.1111/j.1365-2486.2006.01222.x>
- 381 Enquist, B. J., West, G. B., Charnov, E. L., & Brown, J. H. (1999). Allometric scaling of  
382 production and life-history variation in vascular plants. *Nature*, 401, 907–911.  
383 <https://doi.org/10.1038/44819>
- 384 Fenton, N. J., Frego, K. A., & Sims, M. R. (2003). Changes in forest floor bryophyte (moss and  
385 liverwort) communities 4 years after forest harvest. *Canadian Journal of Botany*, 81,  
386 714–731. <https://doi.org/10.1139/b03-063>
- 387 Foster, P. (2001). The potential negative impacts of global climate change on tropical montane  
388 cloud forests. *Earth-Science Reviews*, 55, 73–106. [https://doi.org/10.1016/S0012-](https://doi.org/10.1016/S0012-8252(01)00056-3)  
389 [8252\(01\)00056-3](https://doi.org/10.1016/S0012-8252(01)00056-3)
- 390 Freiberg, M., & Freiberg, E. (2000). Epiphyte diversity and biomass in the canopy of lowland  
391 and montane forests in Ecuador. *Journal of Tropical Ecology*, 16, 673–688.  
392 <https://doi.org/10.1017/S0266467400001644>
- 393 Gehrig-Downie, C., Obregón, A., Bendix, J., & Gradstein, S. R. (2011). Epiphyte biomass and  
394 canopy microclimate in the tropical lowland cloud forest of French Guiana. *Biotropica*,  
395 43, 591–596. <https://doi.org/10.1111/j.1744-7429.2010.00745.x>
- 396 Gignac, L. D. (2001). Bryophytes as indicators of climate change. *The Bryologist*, 104, 410–420.
- 397 Gradstein, S. R. (2008). Epiphytes of tropical montane forests—impact of deforestation and  
398 climate change. *Göttingen Centre for Biodiversity and Ecology. Biodiversity and Ecology*  
399 *Series*, 2, 51–65.
- 400 Häger, A., & Dohrenbusch, A. (2011). Hydrometeorology and structure of tropical montane  
401 cloud forests under contrasting biophysical conditions in north-western Costa Rica.  
402 *Hydrological Processes*, 25, 392–401. <https://doi.org/10.1002/hyp.7726>
- 403 Hölscher, D., Köhler, L., van Dijk, A. I., & Bruijnzeel, L. S. (2004). The importance of epiphytes  
404 to total rainfall interception by a tropical montane rain forest in Costa Rica. *Journal of*  
405 *Hydrology*, 292, 308–322. <https://doi.org/10.1016/j.jhydrol.2004.01.015>
- 406 Hofstede, R. G., Wolf, J. H., & Benzing, D. H. (1993). Epiphytic biomass and nutrient status of a  
407 Colombian upper montane rain forest. *Selbyana*, 14, 37–45.
- 408 Holwerda, F., Bruijnzeel, L., Muñoz-Villers, L., Equihua, M., & Asbjornsen, H. (2010). Rainfall  
409 and cloud water interception in mature and secondary lower montane cloud forests of

- 410 central Veracruz, Mexico. *Journal of Hydrology*, 384, 84–96.  
411 <https://doi.org/10.1016/j.jhydrol.2010.01.012>
- 412 Hsu, C.-C., Horng, F.-W., & Kuo, C.-M. (2002). Epiphyte biomass and nutrient capital of a moist  
413 subtropical forest in north-eastern Taiwan. *Journal of Tropical Ecology*, 18, 659–670.  
414 <https://doi.org/10.1017/S0266467402002432>
- 415 Hu, K.-T., & Huang, C.-y. (2019). A metabolic scaling theory-driven remote sensing approach to  
416 map spatiotemporal dynamics of litterfall in a tropical montane cloud forest.  
417 *International Journal of Applied Earth Observation and Geoinformation*, 82, 101896.  
418 <https://doi.org/10.1016/j.jag.2019.06.006>
- 419 Johansson, D. (1974). Ecology of vascular epiphytes in West African rain forest. *Acta*  
420 *Phytogeographica Seucica*, 59, 1–136.
- 421 Köhler, L., Tobón, C., Frumau, K. A., & Bruijnzeel, L. S. (2007). Biomass and water storage  
422 dynamics of epiphytes in old-growth and secondary montane cloud forest stands in Costa  
423 Rica. *Plant Ecology*, 193, 171–184. <https://doi.org/10.1007/s11258-006-9256-7>
- 424 Kürschner, H., & Parolly, G. (2004). Phytomass and water-storing capacity of epiphytic rain  
425 forest bryophyte communities in S Ecuador. *Botanische Jahrbücher*, 125, 489–504.  
426 <https://doi.org/10.1127/0006-8152/2004/0125-0489>
- 427 Kellner, J. R., Albert, L. P., Burley, J. T., & Cushman, K. (2019). The case for remote sensing of  
428 individual plants. *American Journal of Botany*, 106, 1139–1142.  
429 <https://doi.org/10.1002/ajb2.1347>
- 430 Kimmerer, R. W. (2003). *Gathering Moss: A Natural and Cultural History of Mosses*. Oregon,  
431 US: Oregon State University Press.
- 432 Kleiber, M. (1947). Body size and metabolic rate. *Physiological Reviews*, 27, 511–541.  
433 <https://doi.org/10.1152/physrev.1947.27.4.511>
- 434 Lai, I., Chang, S.-C., Lin, P.-H., Chou, C.-H., & Wu, J.-T. (2006). Climatic characteristics of the  
435 subtropical mountainous cloud forest at the Yuanyang Lake long-term ecological research  
436 site, Taiwan. *Taiwania*, 51, 317–329. [https://doi.org/10.6165/tai.2006.51\(4\).317](https://doi.org/10.6165/tai.2006.51(4).317)
- 437 Ligrone, R., Duckett, J., & Renzaglia, K. (2000). Conducting tissues and phyletic relationships of  
438 bryophytes. *Philosophical Transactions of the Royal Society of London. Series B:*  
439 *Biological Sciences*, 355, 795–813. <https://doi.org/10.1098/rstb.2000.0616>
- 440 McCune, B. (1993). Gradients in epiphyte biomass in three *Pseudotsuga-Tsuga* forests of  
441 different ages in western Oregon and Washington. *The Bryologist*, 96, 405–411.  
442 <https://doi.org/10.2307/3243870>
- 443 McCune, B., Amsberry, K., Camacho, F., Clery, S., Cole, C., Emerson, C., Felder, G., French, P.,  
444 Greene, D., & Harris, R. (1997). Vertical profile of epiphytes in a Pacific Northwest old-  
445 growth forest. *Northwest Science*, 71, 145–152.
- 446 McCune, B., & Lesica, P. (1992). The trade-off between species capture and quantitative  
447 accuracy in ecological inventory of lichens and bryophytes in forests in Montana. *The*  
448 *Bryologist*, 95, 296–304. <https://doi.org/10.2307/3243488>
- 449 McCune, B., Rosentreter, R., Ponzetti, J. M., & Shaw, D. C. (2000). Epiphyte habitats in an old  
450 conifer forest in western Washington, USA. *The Bryologist*, 103, 417–428.  
451 [https://doi.org/10.1639/0007-2745\(2000\)103\[0417:EHIAOC\]2.0.CO;2](https://doi.org/10.1639/0007-2745(2000)103[0417:EHIAOC]2.0.CO;2)
- 452 Mitchell, S. (2013). Wind as a natural disturbance agent in forests: a synthesis. *Forestry: An*  
453 *International Journal of Forest Research*, 86, 147–157.  
454 <https://doi.org/10.1093/forestry/eps058>
- 455 Moffett, M. W., & Lowman, M. D. (1995). Canopy Access Techniques. In M. W. Moffett, & M.

- 456 D. Lowman (Eds), *Forest canopies* (pp. 3–26). San Diego: Academic Press.
- 457 Nöske, N. M., Hilt, N., Werner, F. A., Brehm, G., Fiedler, K., Sipman, H. J., & Gradstein, S. R.  
458 (2008). Disturbance effects on diversity of epiphytes and moths in a montane forest in  
459 Ecuador. *Basic and Applied Ecology*, 9, 4–12. <https://doi.org/10.1016/j.baae.2007.06.014>
- 460 Nadkarni, N. M. (1984a). Biomass and mineral capital of epiphytes in an *Acer macrophyllum*  
461 community of a temperate moist coniferous forest, Olympic Peninsula, Washington State.  
462 *Canadian Journal of Botany*, 62, 2223–2228. <https://doi.org/10.1139/b84-302>
- 463 Nadkarni, N. M. (1984b). Epiphyte biomass and nutrient capital of a neotropical elfin forest.  
464 *Biotropica*, 249–256. <https://doi.org/10.2307/2387932>
- 465 Nadkarni, N. M., Schaefer, D., Matelson, T. J., & Solano, R. (2004). Biomass and nutrient pools  
466 of canopy and terrestrial components in a primary and a secondary montane cloud forest,  
467 Costa Rica. *Forest Ecology and Management*, 198, 223–236.  
468 <https://doi.org/10.1016/j.foreco.2004.04.011>
- 469 Nakanishi, A., Sungpalee, W., Sri-Ngernyuang, K., & Kanzaki, M. (2016). Large variations in  
470 composition and spatial distribution of epiphyte biomass on large trees in a tropical  
471 montane forest of northern Thailand. *Plant Ecology*, 217, 1157–1169.  
472 <https://doi.org/10.1007/s11258-016-0640-7>
- 473 Niklas, K. J. (1993). The allometry of plant reproductive biomass and stem diameter. *American*  
474 *Journal of Botany*, 80, 461–467. <https://doi.org/10.2307/2445392>
- 475 Niklas, K. J. (2006). A phyletic perspective on the allometry of plant biomass-partitioning  
476 patterns and functionally equivalent organ-categories. *New Phytologist*, 171, 27–40.  
477 <https://doi.org/10.1111/j.1469-8137.2006.01760.x>
- 478 Peck, J. E., Hong, W. S., & McCune, B. (1995). Diversity of epiphytic bryophytes on three host  
479 tree species, thermal Meadow, Hotsprings Island, Queen Charlotte Islands, Canada. *The*  
480 *Bryologist*, 98, 123–128. <https://doi.org/10.2307/3243648>
- 481 Pentecost, A. (1998). Some observations on the biomass and distribution of cryptogamic  
482 epiphytes in the upper montane forest of the Rwenzori Mountains, Uganda. *Global*  
483 *Ecology & Biogeography Letters*, 7, 273–284. <https://doi.org/10.2307/2997601>
- 484 Pinheiro, J., & Bates, D. (2006). Mixed-effects models in S and S-PLUS. New York: Springer  
485 Science & Business Media. <https://doi.org/10.1007/b98882>
- 486 Pinheiro, J., Bates, D., DebRoy, S., Sarkar, D., & Team, R. C. (2019). nlme: Linear and nonlinear  
487 mixed effects models. *R Package Version 3.1-141*, 3, 111. Retrieved from [https://cran.r-](https://cran.r-project.org/web/packages/nlme/index.html)  
488 [project.org/web/packages/nlme/index.html](https://cran.r-project.org/web/packages/nlme/index.html)
- 489 Porada, P., Van Stan, J. T., & Kleidon, A. (2018). Significant contribution of non-vascular  
490 vegetation to global rainfall interception. *Nature Geoscience*, 11, 563–567.  
491 <https://doi.org/10.1038/s41561-018-0176-7>
- 492 Ray, D. K., Nair, U. S., Lawton, R. O., Welch, R. M., & Pielke Sr, R. A. (2006). Impact of land  
493 use on Costa Rican tropical montane cloud forests: Sensitivity of orographic cloud  
494 formation to deforestation in the plains. *Journal of Geophysical Research: Atmospheres*,  
495 111. <https://doi.org/10.1029/2005JD006096>
- 496 Rhoades, F. M. (1995). Nonvascular epiphytes in forest canopies: worldwide distribution,  
497 abundance, and ecological roles. In M. D. Lowman, & H. B. Rinker (Eds), *Forest*  
498 *canopies* (pp. 353–408). San Diego, California: Academic Press.
- 499 Rieley, J., Richards, P., & Bebbington, A. (1979). The ecological role of bryophytes in a North  
500 Wales woodland. *Journal of Ecology*, 67, 497–527. <https://doi.org/10.2307/2259109>
- 501 Rodríguez-Quiel, E. E., Mendieta-Leiva, G., & Bader, M. Y. (2019). Elevational patterns of



- 502 bryophyte and lichen biomass differ among substrates in the tropical montane forest of  
503 Baru Volcano, Panama. *Journal of Bryology*, 41, 95–106.  
504 <https://doi.org/10.1080/03736687.2019.1584433>
- 505 Scholl, M., Eugster, W., & Burkard, R. (2011). Understanding the role of fog in forest hydrology:  
506 stable isotopes as tools for determining input and partitioning of cloud water in montane  
507 forests. *Hydrological Processes*, 25, 353–366. <https://doi.org/10.1002/hyp.7762>
- 508 Schulz, H. M., Li, C.-F., Thies, B., Chang, S.-C., & Bendix, J. (2017). Mapping the montane  
509 cloud forest of Taiwan using 12 year MODIS-derived ground fog frequency data. *PloS*  
510 *ONE*, 12, e0172663.
- 511 Sillett, S. C., & Antoine, M. E. (2004). Lichens and bryophytes in forest canopies. In M. D.  
512 Lowman, & H. B. Rinker (Eds), *Forest canopies* (pp. 151–174). Cambridge,  
513 Massachusetts: Academic Press. <https://doi.org/10.1016/B978-012457553-0/50013-7>
- 514 Smith, A. J. E. (1982). Epiphytes and epiliths. In A. J. E. Smith (Ed), *Bryophyte Ecology* (pp.  
515 191–227). Dordrecht, Netherlands: Springer. [https://doi.org/10.1007/978-94-009-5891-3\\_7](https://doi.org/10.1007/978-94-009-5891-3_7)
- 516
- 517 Stadtmüller, T. (1987). *Cloud Forests in the Humid Tropics: A Bibliographic Review*. Tokyo,  
518 Japan: United Nations University Press.
- 519 Stanton, D. E., & Reeb, C. (2016). Morphogeometric approaches to non-vascular plants.  
520 *Frontiers in Plant Science*, 7, 916. <https://doi.org/10.3389/fpls.2016.00916>
- 521 Still, C. J., Foster, P. N., & Schneider, S. H. (1999). Simulating the effects of climate change on  
522 tropical montane cloud forests. *Nature*, 398, 608–610. <https://doi.org/10.1038/19293>
- 523 Tol, G. J., & Cleef, A. M. (1994). Above-ground biomass structure of a *Chusquea tessellata*  
524 bamboo páramo, Chingaza National Park, Cordillera Oriental, Colombia. *Vegetatio*, 115,  
525 29–39. <https://doi.org/10.1007/BF00119384>
- 526 Trynoski, S. E., & Glime, J. M. (1982). Direction and height of bryophytes on four species of  
527 northern trees. *The Bryologist*, 281–300. <https://doi.org/10.2307/3243047>
- 528 Turetsky, M. R. (2003). The role of bryophytes in carbon and nitrogen cycling. *The Bryologist*,  
529 106, 395–410. <https://doi.org/10.1639/05>
- 530 Wang, H.-C., & Huang, C.-Y. (2012). Investigating the spatial heterogeneity of a subtropical  
531 montane cloud forest plantation with a QuickBird image. *International Journal of Remote*  
532 *Sensing*, 33, 7868–7885. <https://doi.org/10.1080/01431161.2012.703346>
- 533 Werner, F., Homeier, J., Oesker, M., & Boy, J. (2012). Epiphytic biomass of a tropical montane  
534 forest varies with topography. *Journal of Tropical Ecology*, 28, 23–31.  
535 <https://doi.org/10.1017/S0266467411000526>
- 536 West, G. B., Brown, J. H., & Enquist, B. J. (1997). A general model for the origin of allometric  
537 scaling laws in biology. *Science*, 276, 122–126.  
538 <https://doi.org/10.1126/science.276.5309.122>
- 539 West, G. B., Brown, J. H., & Enquist, B. J. (1999). A general model for the structure and  
540 allometry of plant vascular systems. *Nature*, 400, 664–667.
- 541 Ye, J., Hao, Z., & Dai, G. (2004). Bryophyte biomass in dark coniferous forest of Changbai  
542 Mountain. *The Journal of Applied Ecology*, 15, 737–740.
- 543 Zotz, G., & Bader, M. Y. (2009). Epiphytic plants in a changing world-global: change effects on  
544 vascular and non-vascular epiphytes. In U. Lüttge, W. Beyschlag, B. Büdel, & D. Francis  
545 (Eds), *Progress in Botany*, vol. 70 (pp. 147–170). Berlin, Heidelberg: Springer.  
546 [https://doi.org/10.1007/978-3-540-68421-3\\_7](https://doi.org/10.1007/978-3-540-68421-3_7)
- 547 Zotz, G., & Vollrath, B. (2003). The epiphyte vegetation of the palm *Socratea exorrhiza*

548 correlations with tree size, tree age and bryophyte cover. *Journal of Tropical Ecology*, 19,  
549 81–90. <https://doi.org/10.1017/S0266467403003092>

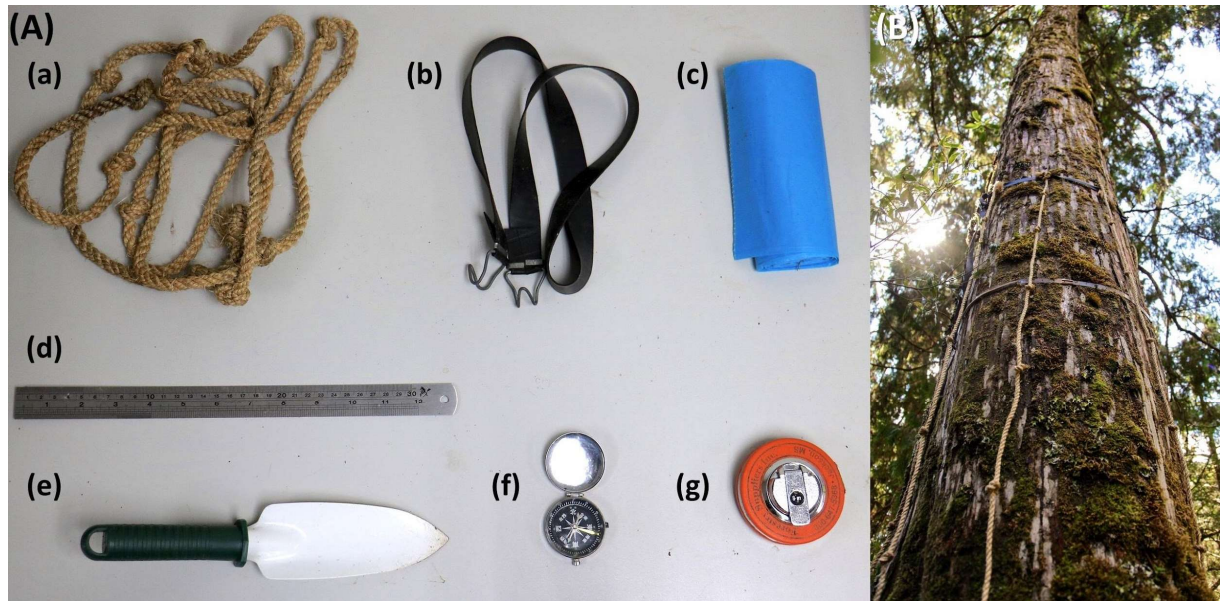

550

551 **FIGURE 1** (A) The field instrument utilized in this study to estimate the biomass of epiphytic  
552 bryophytes (EB) in tropical montane cloud forests of northeastern Taiwan: (a) A 3-m rope with  
553 30 cm long intervals marked by knots, (b) an adjustable rubber strip to fix ropes to a tree stem,  
554 (c) large, strong, and tear-resistant plastic bags to store EB from sampled stem surface area, (d) a  
555 stainless steel ruler to measure the heights of EB mats before removing samples with (e) a  
556 gardening shovel, (f) a compass to facilitate placing ropes in different orientations, (g) a fabric  
557 diameter tape to measure the sampled stem surface area. (B) A demonstration. The photograph  
558 was taken in Chilan Mountain by G. Lai in January 2019.

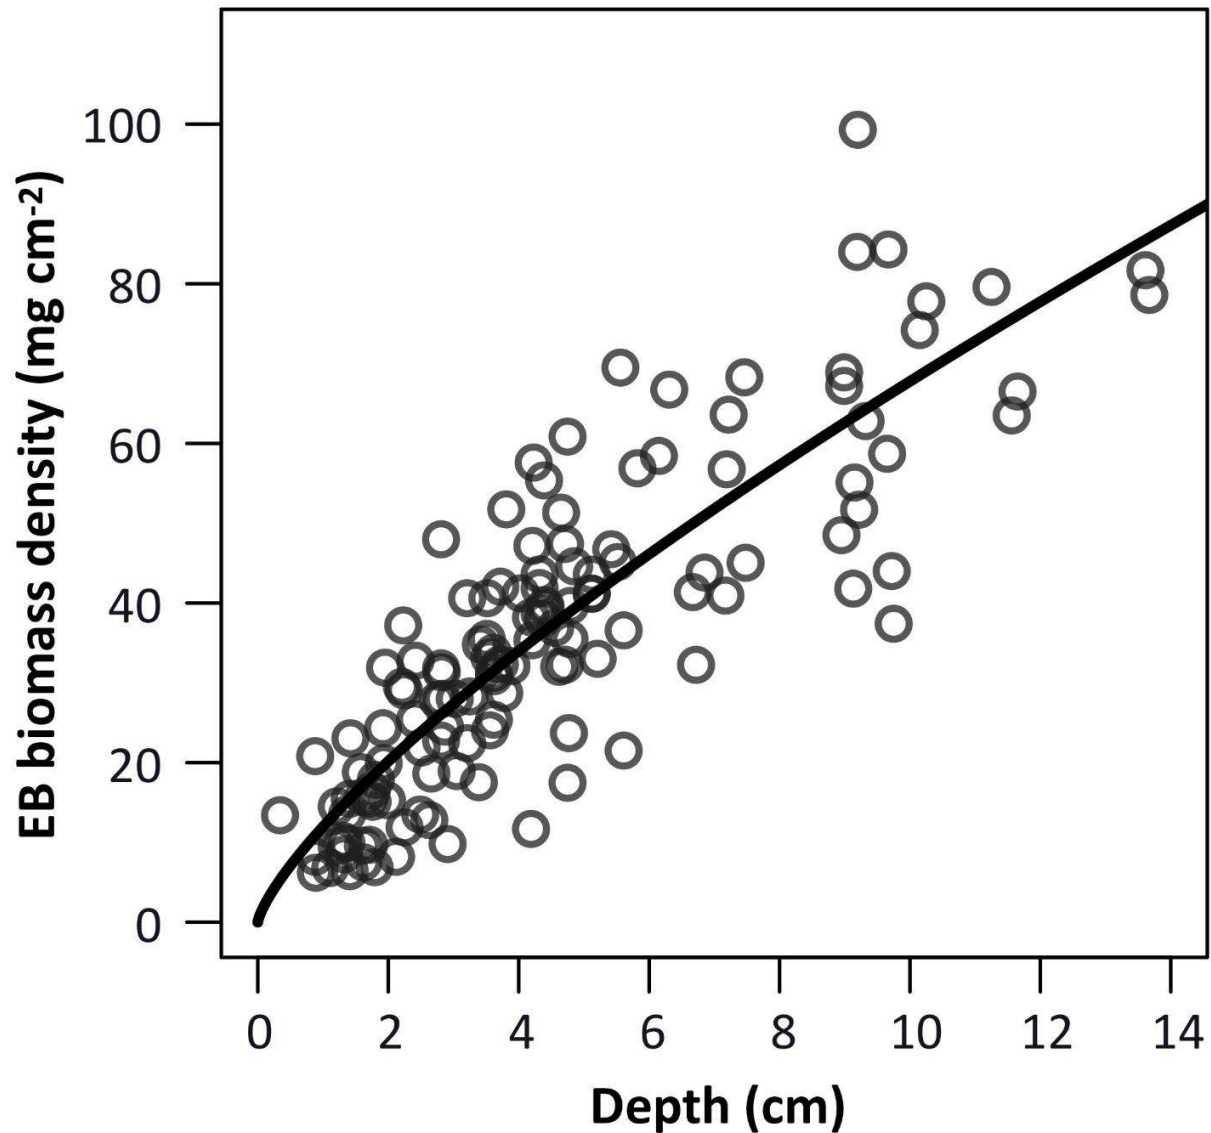

559

560 **FIGURE 2** The best empirical general depth-biomass allometric model of epiphytic bryophytes  
561 (EB). The model was a power of variance covariate function ( $R^2 = 0.72$ ,  $AIC = 380$ ,  $p < 0.001$ ,  $n$   
562  $= 131$ ), and the performance was superior to other models (Table 2) with coefficient and  
563 exponent of 11.96 and 0.75, respectively.



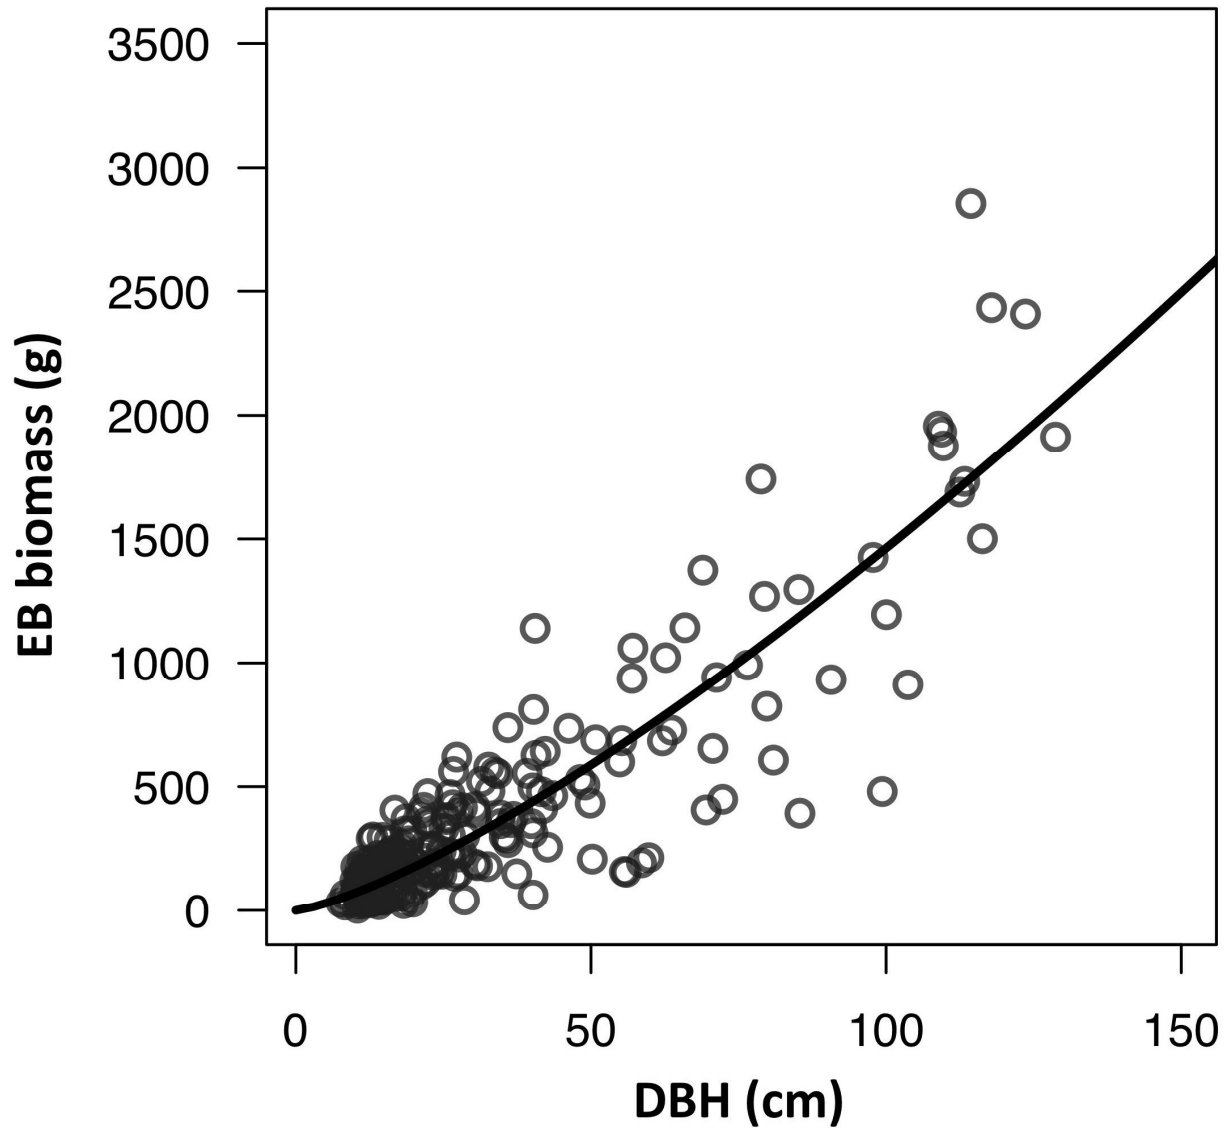

564

565 **FIGURE 3** The relationship between diameter at breast height (DBH) and epiphytic bryophyte  
566 (EB) biomass of sampled stem surface area based upon 10 sampled trees of different DBH sizes  
567 on the 21 field plots ( $n = 210$ , Figure S1):  $EB\ biomass = 3.40DBH^{1.32}$  ( $R^2 = 0.86$ ,  $p < 0.001$ ).

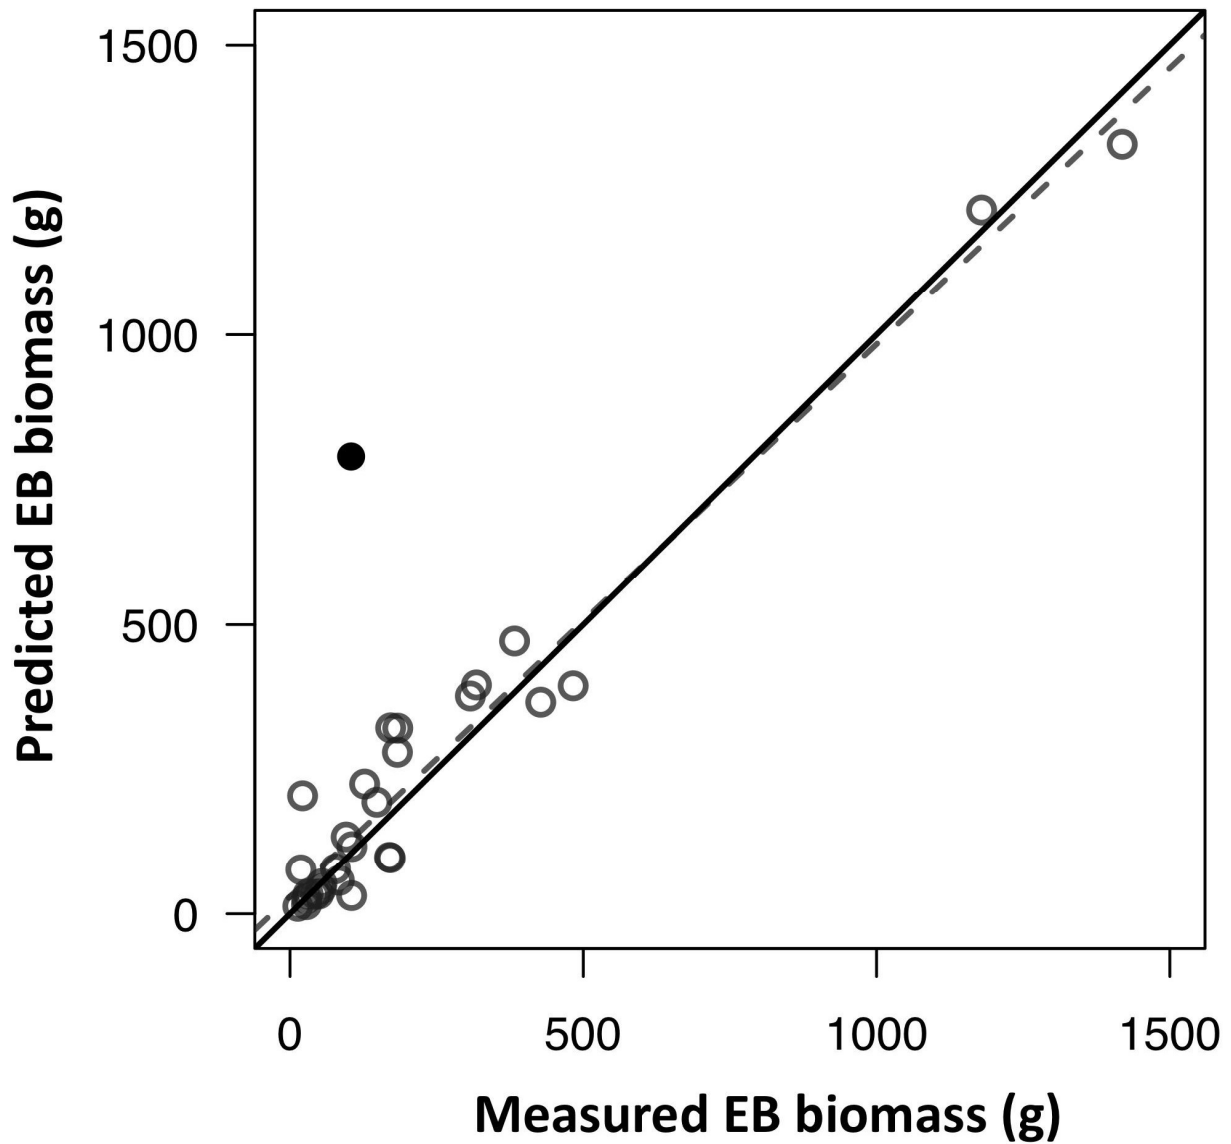

568

569 **FIGURE 4** The comparison of model-predicted epiphytic bryophyte (EB) biomass and field  
570 collected EB biomass. The black solid dot indicates an apparent outlier in which EB inhabited on  
571 decomposed tree bark.

572 **TABLE 1** Summary of the plot or the forest stand scale epiphytic bryophyte (EB) biomass density (kg ha<sup>-1</sup>) research reported in  
573 refereed literature. For the sake of quality, only peer-reviewed articles are listed. The table is organized based upon the data collection  
574 methods; “Climbing” includes the use of rope or ladder, and “Ground” indicates EB samples were reachable from the ground or  
575 removed from fallen logs. We note that studies that combined terrestrial bryophyte biomass or did not specify the collection of EB  
576 biomass only are not listed in this table. Annual precipitation (AP, mm y<sup>-1</sup>), mean annual temperature (MAT, °C) and elevation (m  
577 a.s.l.) of each site were directly obtained from its corresponding article. If the information was missing, it was then obtained from the  
578 internet. The ecosystems labelled as TMCF could be tropical montane cloud forest, or other similar forest ecosystems including  
579 tropical montane rain forest or tropical montane moist forest. The ones categorized as TCF are temperate conifer forests. To make the  
580 comparison legitimate, dead EB and humus mass was not included in the estimation. Studies only sampled part of EB biomass of trees  
581 such as a tree trunk (e.g., Kürschner & Parolly, 2004) are also not listed here.

| Method   | Location                                  | AP   | MAT  | Elevation | Ecosystem | Tree sample      | EB biomass | Reference                            |
|----------|-------------------------------------------|------|------|-----------|-----------|------------------|------------|--------------------------------------|
| Climbing | La Soufrière,<br>Guadeloupe               | 1780 | 26.3 | 1330      | TMCF      | Not<br>available | 12336      | Coxson (1991)                        |
|          | Mascarene<br>Archipelago,<br>Madagascar   | 8000 | 24   | 1350      | TMCF      | Not<br>available | 9020       | Ah-Peng <i>et al.</i><br>(2017)      |
|          | Santa Rosa de<br>Cabal, Colombia          | 1250 | 5.5  | 3700      | TMCF      | 1                | 6850       | Hofstede, Wolf and<br>Benzing (1993) |
|          | Olympic<br>Mountains, US                  | 4700 | 9.6  | 179       | TCF       | 3                | 6527       | Nadkarni (1984a)                     |
|          | Cordillera de<br>Talamanca,<br>Costa Rica | 5193 | 16.8 | 1555      | TMCF      | 15               | 6225       | Köhler <i>et al.</i> (2007)          |

|            |                                     |      |      |      |        |               |      |                               |
|------------|-------------------------------------|------|------|------|--------|---------------|------|-------------------------------|
|            | Monteverde, Costa Rica              | 2591 | 18.6 | 1480 | TMCF   | 25            | 4058 | Nadkarni <i>et al.</i> (2004) |
|            | Cordillera de Talamanca, Costa Rica | 2812 | 10.9 | 2900 | TMCF   | 6             | 1921 | Hölscher <i>et al.</i> (2004) |
|            | Fushan, Taiwan                      | 3600 | 18.2 | 750  | TMCF   | 18            | 1740 | Hsu, Horng and Kuo (2002)     |
|            | Monteverde, Costa Rica              | 2591 | 18.6 | 1700 | TMCF   | 4             | 945  | Nadkarni (1984b)              |
|            | Northeast China                     | 1450 | -0.8 | 875  | TCF    | Not available | 507  | Ye, Hao and Dai (2004)        |
|            | The Tilaran Range, Costa Rica       | 5380 | 17.7 | 1325 | TMCF   | 6             | 206  | Häger and Dohrenbusch (2011)  |
| Harvesting | Monteverde, Costa Rica              | 2591 | 18.6 | 1480 | TMCF   | 9             | 2087 | Nadkarni <i>et al.</i> (2004) |
|            | Yunnan, China                       | 1931 | 11.3 | 2500 | TMCF   | 77            | 1663 | Chen, Liu and Wang (2010)     |
|            | Cordillera Oriental, Colombia       | 1850 | 6    | 3650 | Bamboo | Not available | 1281 | Tol and Cleef (1994)          |
|            | Rwenzor Mountains, Uganda           | 2000 | 8.5  | 3230 | TMCF   | 1             | 1000 | Pentecost (1998)              |
|            | Marafunga Basin, New Guinea         | 3985 | 13   | 2625 | TMCF   | 42            | 940  | Edwards and Grubb (1977)      |
|            | Zamora Chinchipe, Ecuador           | 2080 | 15.5 | 2093 | TMCF   | 63            | 604  | Werner <i>et al.</i> (2012)   |

|         |                         |      |      |      |                  |     |     |                                        |
|---------|-------------------------|------|------|------|------------------|-----|-----|----------------------------------------|
|         | Central French Guiana   | 2500 | 27   | 288  | TMCF             | 15  | 452 | Gehrig-Downie <i>et al.</i> (2011)     |
|         | Cascade Range, US       | 2450 | 9.2  | 655  | TCF              | 42  | 323 | McCune (1993)                          |
| Ground  | Southern Thailand       | 2000 | 28.5 | 804  | Tropical forests | 51  | 126 | Chantanaorrapint and Frahm (2011)      |
|         | North Wales, UK         | 2187 | 10.3 | 98   | TCF              | 16  | 87  | Rieley, Richards and Bebbington (1979) |
| Scaling | Chilan mountain, Taiwan | 3500 | 12.7 | 1680 | TMCF             | 210 | 272 | This study                             |

---

582

583 **TABLE 2** Model performance comparison of allometric equations ( $W = \alpha D^\beta$ , equation (1)) by referring to values of the Akaike  
584 Information Criterion (AIC), the Bayesian Information Criterion (BIC) and log likelihood. We note that all models are significant with  
585  $p < 0.001$ .

| Model                                  | $\alpha$ | $\beta$ | R <sup>2</sup> | AIC    | BIC    | Log likelihood |
|----------------------------------------|----------|---------|----------------|--------|--------|----------------|
| Nonlinear squared regression           | 12.62    | 0.72    | 0.72           | 395.12 | 403.75 | -194.56        |
| Nonlinear squared regression*          | 10.00    | 0.84    | 0.70           | 400.34 | 406.09 | -198.17        |
| Power of a variance covariate          | 11.96    | 0.75    | 0.72           | 379.92 | 391.43 | -185.96        |
| Exponential of a variance covariate    | 11.77    | 0.77    | 0.72           | 380.12 | 391.62 | -186.06        |
| Constant power of a variance covariate | 11.78    | 0.76    | 0.70           | 380.91 | 395.28 | -185.45        |

586 \*Nonlinear squared regression with the fixed  $\alpha$  of 10.00
